# Supplementary material for: Dual-responsive polyphosphazene as a common platform for highly efficient drug self-delivery
Source: Royal Society of Chemistry journal article supplement (doi:10.1039/c9tb00801b), 2019-01-01
Supplement: c9tb00801b1.pdf [file c9tb00801b1.pdf]

Electronic Supplementary Material (ESI) for Journal of Materials Chemistry B  
This journal is © The Royal Society of Chemistry 2019

## Supporting Information

### Dual-Responsive Polyphosphazene as a Common Platform for Highly Efficient Drug Self-Delivery

*Shenglei Hou,<sup>a</sup> Shuangshuang Chen,<sup>\*b</sup> Zhangjun Huang,<sup>c</sup> and Qinghua Lu.<sup>\*a</sup>*

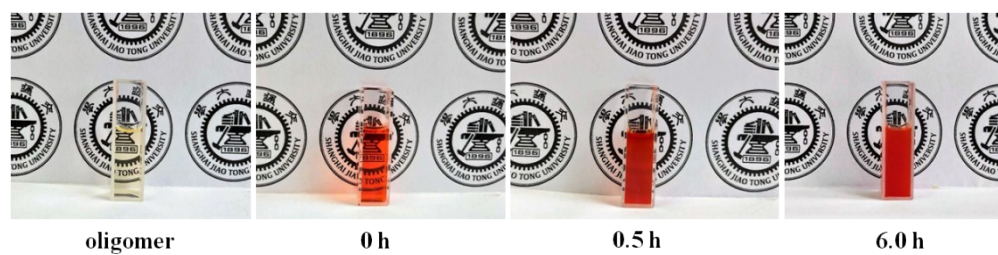

**Figure S1.** Photographs of HCCP-CysM oligomer solution, and the reaction mixture after 0 h, 0.5 h, and 6.0 h.

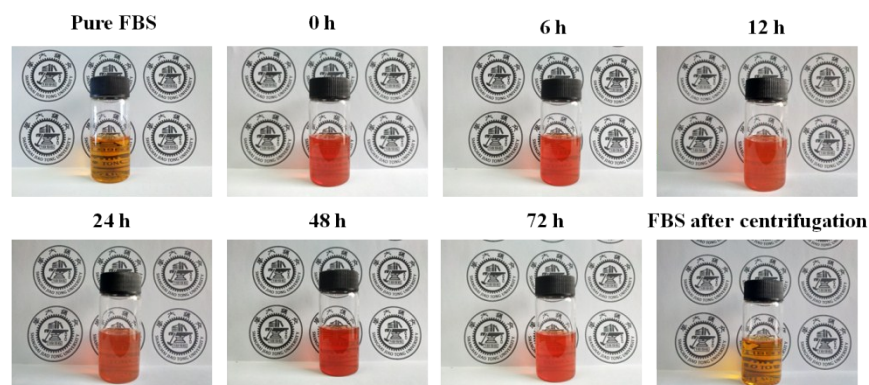

**Figure S2.** Photographs of pure PBS, DOX-CysM-CPPZ NPs dispersed in FBS for 0 h, 6 h, 12 h, 24 h, 48 h and 72 h and PBS after centrifugation.

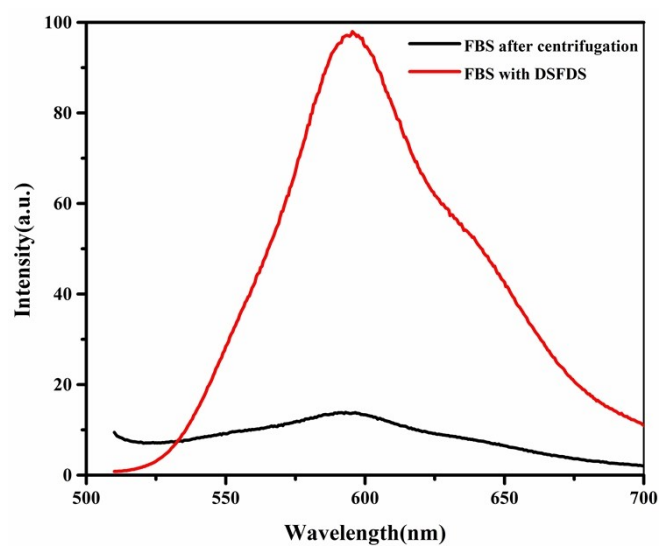

**Figure S3.** The luminescence spectrum of FBS with DSFDS and FBS after removing DSFDS.

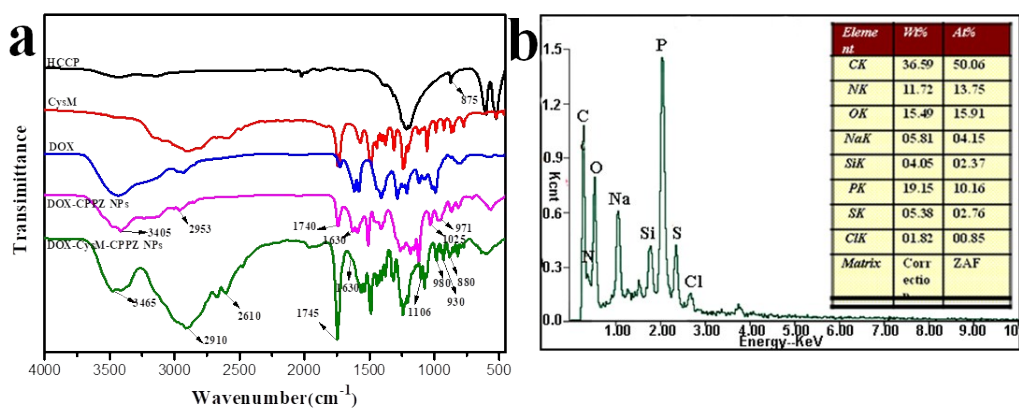

**Figure S4.** a) FTIR spectra of free DOX, HCCP, DOX-CPPZ NPs, and DOX-CysM-CPPZ NPs. b) EDX spectrum and element contents of the DOX-CysM-CPPZ NPs.

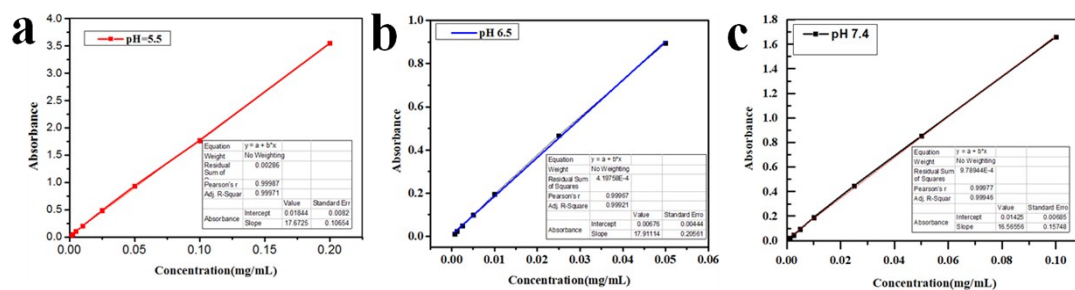

**Figure S5.** Standard curves of UV absorbance at 480 nm versus concentration of free DOX at pH 5.5 (a), 6.5 (b), and 7.0 (c).

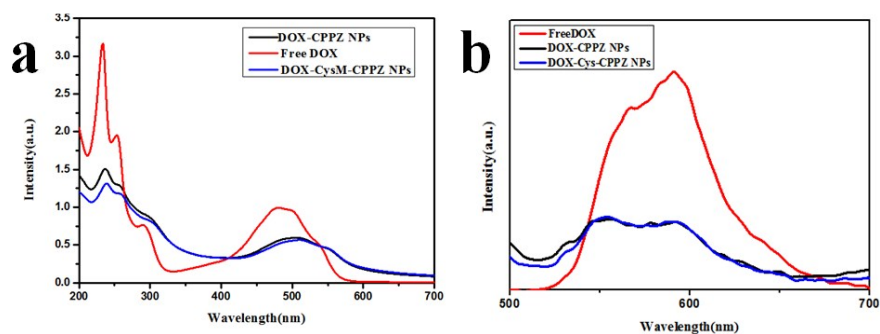

**Figure S6.** UV/Vis spectra (a) and luminescence spectra (b) of free DOX, DOX-CPPZ NPs, and DOX-CysM-CPPZ NPs.

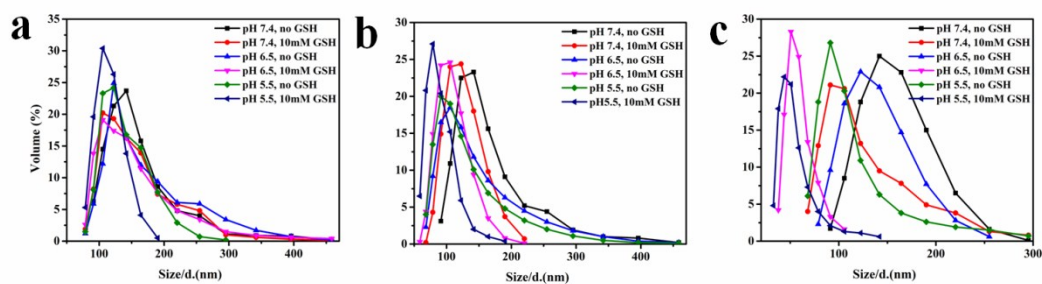

**Figure S7.** DLS data of DOX-CysM-CPPZ NPs during degradation processes in pH 7.4, 6.5 and 5.5 PBS with 10 mM GSH or not after a) 1 day, b) 2 days, and c) 3 days.

**Table S1.** DLS data of DOX-CysM-CPPZ NPs during degradation processes in DI water, pH 7.4, 6.5, 5.5, and 4.0 PBS after 1 day, 2 days, and 3 days. Drug release rates calculated from particle size change.

|    | GSH (mM) | pH 7.4              |                     |                  | pH 6.5  |        |       | pH 5.5  |        |       |
|----|----------|---------------------|---------------------|------------------|---------|--------|-------|---------|--------|-------|
|    |          | VRR(%) <sup>a</sup> | PZ(nm) <sup>b</sup> | PDI <sup>c</sup> | VRR (%) | PZ(nm) | PDI   | VRR (%) | PZ(nm) | PDI   |
| 1D | 0        | 5.8                 | 129.9               | 0.201            | 27.1    | 119.2  | 0.210 | 38.6    | 112.6  | 0.155 |
|    | 10       | 52.5                | 103.4               | 0.268            | 59.2    | 98.3   | 0.263 | 68.6    | 90.1   | 0.094 |
| 2D | 0        | NA                  | 137.2               | 0.217            | 29.6    | 117.9  | 0.297 | 41.0    | 111.1  | 0.264 |
|    | 10       | 59.2                | 98.5                | 0.152            | 63.7    | 94.5   | 0.127 | 77.3    | 80.888 | 0.075 |
| 3D | 0        | NA                  | 148.3               | 0.144            | 31.9    | 116.2  | 0.241 | 43.2    | 109.7  | 0.199 |
|    | 10       | 58.9                | 95.4                | 0.208            | 63.7    | 89.4   | 0.108 | 86.4    | 66.5   | 0.118 |

<sup>a</sup>) (Volume Release Rate); <sup>b</sup>) (Particle Size); <sup>c</sup>) (Polydispersity Index)

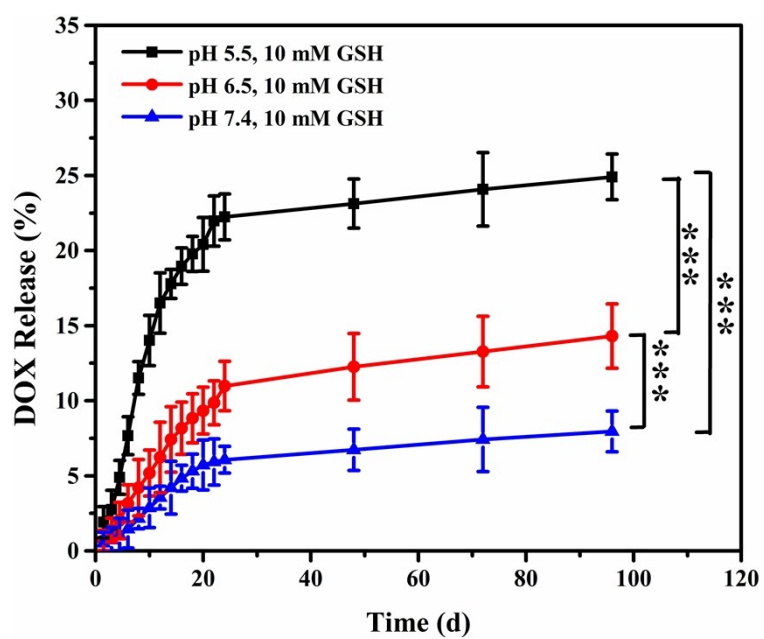

**Figure S8.** DOX release from DOX-CPPZ NPs triggered at different pH values and 10 mM GSH.

**TEM characterization of DSFDs in cells:** HeLa cells were seeded in a culture dish of diameter 60 mm (Corning) and cultured overnight for cell attachment. They were then incubated with DOX-CysM-CPPZ NPs ( $2.56 \mu\text{g mL}^{-1}$ ) in FBS-free culture medium for 12 h. For TEM analysis, HeLa cells were washed with PBS and then fixed with 2% glutaraldehyde and 1% osmium tetroxide for 2 h at 48 °C. They were then dehydrated in a graded series of ethanolic media (30, 50, 70% with 3% uranyl acetate, 80, 95, and 100%) for 10 min at each concentration, followed by two replacements of the medium with 100% propylene oxide. After infiltration and embedding in epoxy resin at 60 °C for 48 h, the sections were stained with lead citrate and investigated by TEM.

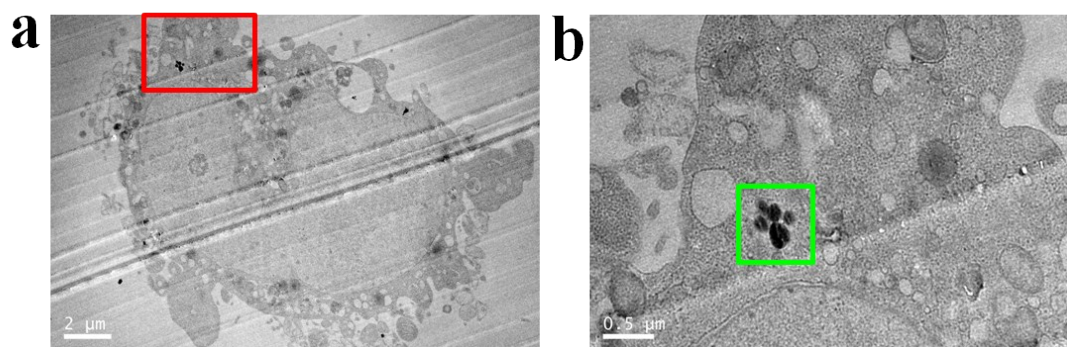

**Figure S9.** TEM images of an HeLa cell after incubation with DOX-CysM-CPPZ NPs ( $2.56 \mu\text{g mL}^{-1}$ ) in FBS-free culture medium for 12 h. a) TEM image of a single HeLa cell, b) high magnification image of the area within the red box in a). Scale bars: a) 2  $\mu\text{m}$ , b) 0.5  $\mu\text{m}$ .

**Synthesis of CysM-CPPZ NPs:** CysM-CPPZ NPs was prepared according to a previously published procedure.<sup>1</sup> HCCP (0.5 g), CysM (0.48 g), and TEA (3 mL) were dissolved in MeCN (30 mL), and the solution was stirred for 6 h at room temperature. When the reaction was complete, the mixture was centrifuged (10,280 rpm for 2 min) and the supernatant was removed and collected. 10 mL of each of the PN-CysM oligomer solution was injected into a 50 mL round-bottom flask. 12 mL deionized water was added dropwise to reach the LCSP over 5 min under stirring conditions. The white solid was collected by centrifugation and washed three times with deionized water and alcohol successively

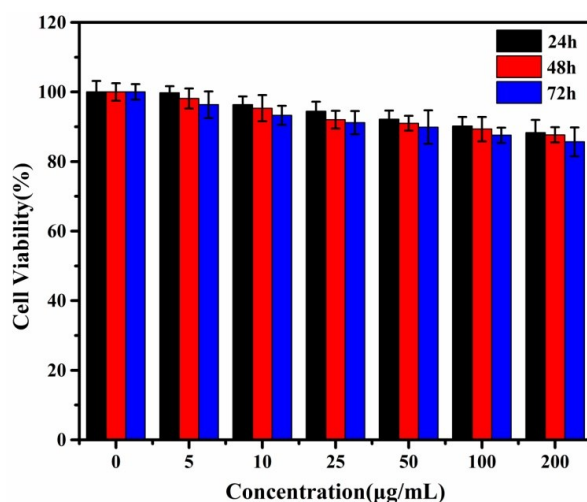

**Figure S10.** Clone 8 fibroblasts viability after 24, 48, and 72 h incubation with different concentrations of CysM-CPPZ NPs.

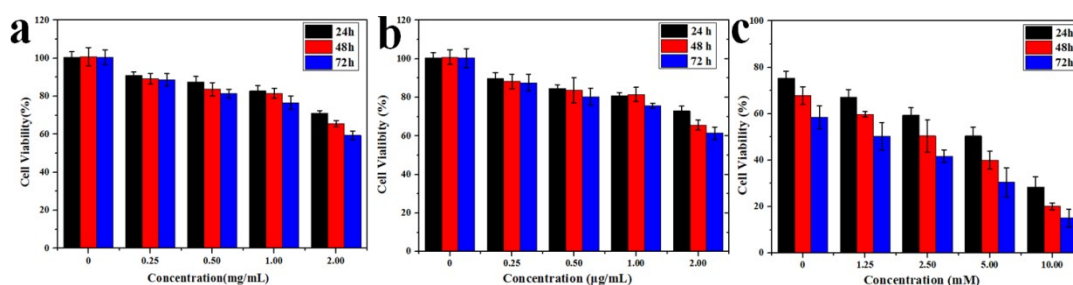

**Figure S11.** Killing efficiencies of (a) DOX-CPPZ NPs and (b) DOX-CysM-CPPZ NPs towards NEM-treated HeLa cells after 24, 48, and 72 h incubation with different equivalent concentrations of DOX). c) Killing efficiencies of DOX-CysM-CPPZ NPs (illustrated using  $2 \mu\text{g mL}^{-1}$  DOX) towards HeLa cells treated with different concentrations of GSH-OEt, after 24, 48, and 72 h of incubation.



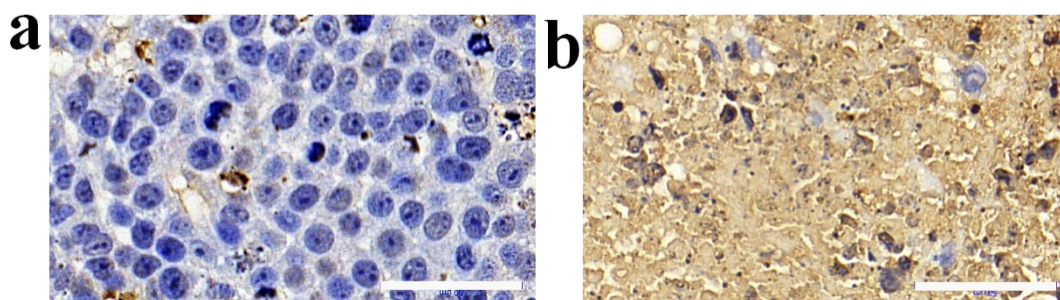

**Figure S12.** Enlarged immunohistochemical images of tumor issue. Tumor biopsies for TUNEL assay from a) the PBS treatment group and b) the DOX-CysM-CPPZ NPs treatment group. Scale bar is 50  $\mu\text{m}$ .

1. Z. Huang, S. Chen, X. Lu and Q. Lu, *Chem Commun* **2015**, *51*, 8373-8376.
